# Supplementary material
Source: HighWire-hosted journal article supplement (https://bmjopen.bmj.com/content/6/8/e012352)
Supplement: inline-supplementary-material-1 [file inline-supplementary-material-1.pdf]

## Healthlines CVD 12 month economic evaluation – Online supplementary information

**Table A1 Unit costs for primary care and personal social services <sup>a</sup>**

| Services                                       | Unit Cost | Comments                                                                                                             |
|------------------------------------------------|-----------|----------------------------------------------------------------------------------------------------------------------|
| GP clinic consultation                         | 34.00     | Based on a 11.7-minute consultation                                                                                  |
| GP telephone consultation                      | 20.00     | Based on a 7.1-minute consultation                                                                                   |
| GP home visit                                  | 85.00     | Based on a 23.4-minute visit                                                                                         |
| Out-of-hours GP service face-to-face at clinic | 25.03     | Estimate derived from Scott <sup>1</sup> and increased by 22% as per O'Dowd, <sup>2</sup> inflated to 2012/13 prices |
| GP out-of-hours service home visits            | 62.56     | Adjusted for duration in line with GP consultations                                                                  |
| GP out-of-hours service phone calls            | 14.72     | Adjusted for duration in line with GP consultations                                                                  |
| Practice nurse clinic consultation             | 11.37     | Based on 15.5-minute consultation                                                                                    |
| Practice nurse telephone consultation          | 6.69      | Based on 9.4-minute consultation                                                                                     |
| <b>Other primary and community care</b>        |           |                                                                                                                      |
| Counsellor clinic consultation                 | 58.00     | Assume 55-minute consultation                                                                                        |
| Counsellor telephone consultation              | 15.75     | Assume average length of call is 15 minutes                                                                          |
| Dietician                                      | 14.67     | Assume 20-minute consultation                                                                                        |
| District nurse home visit                      | 60.00     | Includes non-contact time related to the visit, assume visits plus these activities take one hour                    |
| District nurse phone consultation              | 10.50     | Assume average length of call is 15 minutes                                                                          |
| Health trainer                                 | 14.67     | Same as practice nurse, but assumed appointment time of 20 minutes                                                   |
| Midwife                                        | 12.75     | Assumed a 15-minute consultation                                                                                     |
| NHS walk-in centre                             | 34.06     | Munro <i>et al.</i> , <sup>3</sup> inflated to 2012/13 prices                                                        |

|                                            |       |                                                               |
|--------------------------------------------|-------|---------------------------------------------------------------|
| NHS walk-in centre phone consultation      | 22.23 | Munro <i>et al.</i> , <sup>3</sup> inflated to 2012/13 prices |
| Occupational therapist clinic consultation | 34.00 | Assume 23-minute consultation                                 |
| Occupational therapist home visit          | 62.09 | Assume 42-minute visit                                        |
| Occupational therapist phone consultation  | 18.72 | Assume average length of call is 12.7 minutes                 |
| Phlebotomist consultation                  | 6.46  | Assume a 15.5-minute consultation                             |
| Physician associate                        | 22.00 | Costed as per specialist nurses                               |
| Physiotherapist                            | 30.00 | Assume one-hour consultation                                  |
| Podiatry                                   | 30.00 | Assume one-hour consultation                                  |
| Specialist nurse (e.g. asthma nurse)       | 22.00 | Costed per consultation                                       |

---

a The source of the costs for the services in this table is Curtis,<sup>4</sup> unless otherwise referenced

**Table A2 National average unit costs of hospital-related services<sup>a</sup>**

| <b>Services</b>                                                        | <b>National average unit cost (£)</b> |
|------------------------------------------------------------------------|---------------------------------------|
| <b>CVD risk</b>                                                        |                                       |
| <b>Inpatient stays</b>                                                 |                                       |
| Arrhythmia or Conduction Disorders with CC Score 4-6                   | 571                                   |
| Major Knee Procedures for Non-Trauma, Category 2, without CC           | 5,676                                 |
| Minor Vascular Interventional Radiology Procedures                     | 766                                   |
| Syncope or Collapse with CC Score 0-3                                  | 528                                   |
| Unspecified Chest Pain with CC Score 0-4                               | 533                                   |
| <b>Day care and outpatient visits</b>                                  |                                       |
| Arrhythmia or Conduction Disorders with CC Score 0-3                   | 818                                   |
| Cardiology: Non-Admitted Face to Face Attendance, First                | 167                                   |
| Cardiology: Non-Admitted Face to Face Attendance, Follow-up            | 126                                   |
| Computerised Tomography Scan, one area, no contrast, 19 years and over | 104                                   |
| Diabetics: Non-Admitted Face to Face Attendance, First                 | 189                                   |
| Diabetics: Non-Admitted Face to Face Attendance, Follow-up             | 142                                   |
| Electrocardiogram Monitoring and stress testing (day case)             | 477                                   |
| Electrocardiogram Monitoring and stress testing (outpatient)           | 136                                   |
| General Medicine: Non-Admitted Face to Face Attendance, Follow-up      | 102                                   |
| Nephrology: Non-Admitted Face to Face Attendance, Follow-up            | 116                                   |
| Nuclear Medicine, Category 3                                           | 196                                   |
| Ophthalmology: Non-Admitted Face to Face Attendance, Follow-up         | 80                                    |
| Percutaneous Standard Ablation, with CC Score 0-2                      | 2,367                                 |
| Simple Echocardiogram, 19 years and over                               | 77                                    |
| Unspecified Chest Pain with CC Score 0-4                               | 690                                   |
| <b>Accident and emergency</b>                                          |                                       |
| Accident and Emergency - Type 01 Non-Admitted                          | 96                                    |
| <b>Paramedic/ambulance</b>                                             |                                       |

|                          |     |
|--------------------------|-----|
| See and treat or refer   | 196 |
| See and treat and convey | 255 |

---

a The cost of these hospital-related services was based on NHS Reference Costs 2012/13<sup>5</sup> and Curtis.<sup>6</sup>

**Table A3 Unit costs of resources involved in delivering telehealth intervention**

| Primary care services                           | Cost       |
|-------------------------------------------------|------------|
| Basic HIA annual salary (Band 4)                | £20,638.00 |
| Oncosts: National insurance and super annuation | £4,827.00  |
| Overheads                                       | £35,417.00 |
| Cost per hour                                   | £23.61     |
| Training cost per HIA per hour                  | £0.61      |
| Ratio of contact: non-contact time              | 2:1        |
| Adjusted cost per hour of HIA time              | £36.34     |
| BP monitor                                      | £37.50     |

HIA = Health Information Advisor; BP = blood pressure.

**Table A4 Mean (SD) number of primary care consultations in the depression trial: all available data and complete cases**

| Primary care services            | Usual care |             | Intervention |                        |
|----------------------------------|------------|-------------|--------------|------------------------|
|                                  | N          | Mean (SD)   | N            | Intervention mean (SD) |
| <b>All available data</b>        |            |             |              |                        |
| GP consultations                 | 313        | 5.30 (4.53) | 325          | 5.48 (4.38)            |
| Nurse consultations              | 313        | 3.03 (4.31) | 325          | 2.79 (2.93)            |
| Other primary care consultations | 313        | 3.09 (3.91) | 325          | 3.01 (3.95)            |
| <b>Complete cases</b>            |            |             |              |                        |
| GP consultations                 | 266        | 5.21 (4.42) | 262          | 5.09 (3.79)            |
| Nurse consultations              | 266        | 3.06 (4.50) | 262          | 2.83 (3.05)            |
| Other primary care consultations | 266        | 3.14 (3.87) | 262          | 3.05 (4.18)            |

**Table A5 Mean (SD) cost (£) per participant of primary care consultations in the trial: all available data and complete cases**

|                                  | Usual care |                 | Intervention |                 |
|----------------------------------|------------|-----------------|--------------|-----------------|
| Primary care services            | N          | Mean £ (SD)     | N            | Mean £ (SD)     |
| <b>All available data</b>        |            |                 |              |                 |
| GP consultations                 | 313        | 168.92 (143.25) | 325          | 172.48 (131.77) |
| Nurse consultations              | 313        | 33.82 (48.34)   | 325          | 31.12 (32.68)   |
| Other primary care consultations | 313        | 19.14 (26.68)   | 325          | 19.13 (26.00)   |
| Total primary care cost          | 313        | 221.88 (166.20) | 325          | 222.73 (150.70) |
| <b>Complete cases</b>            |            |                 |              |                 |
| GP consultations                 | 266        | 165.46 (137.19) | 262          | 160.74 (116.66) |
| Nurse consultations              | 266        | 34.27 (50.53)   | 262          | 31.66 (34.06)   |
| Other primary care consultations | 266        | 19.27 (25.94)   | 262          | 19.35 (27.45)   |
| Total primary care cost          | 266        | 219.00 (164.17) | 262          | 211.76 (138.99) |

**Table A6 Mean (SD) number of prescribed medication items and cost (£) per participant in the depression trial: all available data and complete cases**

|                                          | Usual care |                 | Intervention |                 |
|------------------------------------------|------------|-----------------|--------------|-----------------|
| Primary care services                    | N          | Mean (SD)       | N            | Mean (SD)       |
| <b>No. of prescribed items</b>           |            |                 |              |                 |
| All available data                       | 313        | 20.83 (21.41)   | 325          | 20.52 (20.79)   |
| Complete cases                           | 266        | 21.08 (21.40)   | 262          | 20.91 (21.33)   |
| <b>Cost of prescribed medication (£)</b> |            |                 |              |                 |
| All available data                       | 313        | £67.38 (136.56) | 325          | £66.59 (102.38) |
| Complete cases                           | 266        | £67.78 (139.04) | 262          | £65.21 (102.51) |

**Table A7 Mean (SD) number of contacts with NHS community services per participant in the trial: all available data and complete cases**

|                           | Usual care |                             | Intervention |                              |
|---------------------------|------------|-----------------------------|--------------|------------------------------|
| Community services        | N          | Mean(SD) number of contacts | N            | Mean (SD) number of contacts |
| <b>All available data</b> |            |                             |              |                              |
| District nurse home visit | 290        | 0.07 (0.52)                 | 292          | 0.08 (1.18)                  |

|                                                |     |             |     |             |
|------------------------------------------------|-----|-------------|-----|-------------|
| District nurse phone consultation              | 290 | 0.01 (0.08) | 292 | 0.09 (0.66) |
| NHS counsellor/psychologist clinic visit       | 290 | 0.08 (0.61) | 292 | 0.10 (0.81) |
| NHS counsellor/psychologist phone consultation | 290 | -           | 292 | 0.16 (0.92) |
| NHS walk-in centre clinic visit                | 290 | 0.21 (1.09) | 292 | 0.17 (1.33) |
| NHS walk-in centre phone consultation          | 290 | 0.02 (0.23) | 292 | 0.07 (0.69) |
| GP out-of-hours service clinic visit           | 290 | 0.03 (0.25) | 292 | 0.05 (0.36) |
| GP out-of-hours service home visit             | 290 | 0.01 (0.08) | 292 | 0.01 (0.13) |
| GP out-of-hours service phone consultation     | 290 | 0.05 (0.35) | 292 | 0.11 (0.70) |

#### Complete cases

|                                                |     |             |     |             |
|------------------------------------------------|-----|-------------|-----|-------------|
| District nurse home visit                      | 266 | 0.05 (0.45) | 262 | 0.01 (0.12) |
| District nurse phone consultation              | 266 | 0.00 (0.06) | 262 | 0.10 (0.69) |
| NHS counsellor/psychologist clinic visit       | 266 | 0.08 (0.63) | 262 | 0.08 (0.77) |
| NHS counsellor/psychologist phone consultation | 266 | -           | 262 | 0.18 (0.97) |
| NHS walk-in centre clinic visit                | 266 | 0.23 (1.13) | 262 | 0.16 (1.32) |
| NHS walk-in centre phone consultation          | 266 | 0.03 (0.24) | 262 | 0.06 (0.72) |
| GP out-of-hours service clinic visit           | 266 | 0.03 (0.27) | 262 | 0.04 (0.29) |
| GP out-of-hours service home visit             | 266 | 0.01 (0.09) | 262 | 0.01 (0.12) |
| GP out-of-hours service phone consultation     | 266 | 0.05 (0.36) | 262 | 0.10 (0.72) |

**Table A8 Mean (SD) cost (£) per participant of NHS community services in the trial: all available data and complete cases**

|                                          | Usual care |              | Intervention |              |
|------------------------------------------|------------|--------------|--------------|--------------|
|                                          | N          | Mean £ (SD)  | N            | Mean £ (SD)  |
| <b>Primary care services</b>             |            |              |              |              |
| <b>All available data</b>                |            |              |              |              |
| District nurse home visit                | 285        | 4.21 (31.56) | 285          | 4.63 (71.41) |
| District nurse phone consultation        | 285        | 0.07 (0.88)  | 285          | 0.96 (6.98)  |
| NHS counsellor/psychologist clinic visit | 285        | 4.48 (35.48) | 285          | 5.90 (47.45) |

|                                                |     |               |     |                |
|------------------------------------------------|-----|---------------|-----|----------------|
| NHS counsellor/psychologist phone consultation | 285 | -             | 285 | 2.65 (14.72)   |
| NHS walk-in centre clinic visit                | 285 | 7.29 (37.37)  | 285 | 5.98 (45.88)   |
| NHS walk-in centre phone consultation          | 285 | 0.55 (5.08)   | 285 | 1.33 (15.38)   |
| GP out-of-hours service clinic visit           | 285 | 1.07 (8.73)   | 285 | 1.67 (12.32)   |
| GP out-of-hours service home visit             | 285 | 0.60 (7.11)   | 285 | 0.89 (11.24)   |
| GP out-of-hours service phone consultation     | 285 | 0.91 (6.96)   | 285 | 2.18 (14.22)   |
| Total costs for available cases                | 285 | 19.18 (63.69) | 285 | 26.19 (117.03) |
| <b>Complete cases</b>                          |     |               |     |                |
| District nurse home visit                      | 266 | 3.16 (26.90)  | 262 | 0.46 (7.41)    |
| District nurse phone consultation              | 266 | 0.04 (0.64)   | 262 | 1.04 (7.28)    |
| NHS counsellor/psychologist clinic visit       | 266 | 4.80 (36.71)  | 262 | 4.87 (44.57)   |
| NHS counsellor/psychologist phone consultation | 266 | -             | 262 | 2.83 (15.31)   |
| NHS walk-in centre clinic visit                | 266 | 7.68 (38.61)  | 262 | 5.46 (44.89)   |
| NHS walk-in centre phone consultation          | 266 | 0.59 (5.26)   | 262 | 1.44 (16.04)   |
| GP out-of-hours service clinic visit           | 266 | 1.15 (9.03)   | 262 | 1.30 (9.79)    |
| GP out-of-hours service home visit             | 266 | 0.64 (7.36)   | 262 | 0.65 (10.50)   |
| GP out-of-hours service phone consultation     | 266 | 0.98 (7.20)   | 262 | 2.06 (14.34)   |
| Total costs for complete cases                 | 266 | 19.03 (63.38) | 262 | 20.11 (93.07)  |

**Table A9 Mean (SD) number of hospital encounters and use of ambulance services in the trial: all available data and complete cases**

| Services                  | Usual care |                                | Intervention |                                |
|---------------------------|------------|--------------------------------|--------------|--------------------------------|
|                           | N          | Mean (SD) number of encounters | N            | Mean (SD) number of encounters |
| <b>All available data</b> |            |                                |              |                                |
| Overnight hospital stay   | 296        | 0.01 (0.10)                    | 297          | 0.01 (0.12)                    |
| Day care                  | 296        | 0.03 (0.18)                    | 297          | 0.01 (0.08)                    |
| Outpatient clinic         | 293        | 0.04 (0.33)                    | 294          | 0.04 (0.26)                    |
| Accident and emergency    | 298        | 0.01 (0.10)                    | 299          | 0.01 (0.14)                    |



|                         |     |             |     |             |
|-------------------------|-----|-------------|-----|-------------|
| Other hospital services | 297 | 0.01 (0.12) | 299 | 0.01 (0.10) |
| Ambulance use           | 294 | 0.01 (0.08) | 296 | 0.01 (0.10) |

#### Complete cases

|                         |     |             |     |             |
|-------------------------|-----|-------------|-----|-------------|
| Overnight hospital stay | 266 | 0.01 (0.11) | 262 | 0.02 (0.12) |
| Day care                | 266 | 0.03 (0.19) | 262 | 0.01 (0.09) |
| Outpatient clinic       | 266 | 0.04 (0.35) | 262 | 0.04 (0.27) |
| Accident and emergency  | 266 | 0.01 (0.11) | 262 | 0.02 (0.15) |
| Other hospital services | 266 | 0.02 (0.12) | 262 | 0.01 (0.09) |
| Ambulance use           | 266 | 0.01 (0.09) | 262 | 0.01 (0.11) |

**Table A10 Mean (SD) cost (£) per participant of hospital and ambulance care in the trial: all available data and complete cases**

| Services                                   | Usual care |                | Intervention |                |
|--------------------------------------------|------------|----------------|--------------|----------------|
|                                            | N          | Mean £ (SD)    | N            | Mean £ (SD)    |
| <b>All available data</b>                  |            |                |              |                |
| Overnight hospital stay                    | 296        | 6.31 (63.35)   | 297          | 24.73 (333.73) |
| Day care                                   | 298        | 15.68 (153.05) | 299          | 1.08 (13.46)   |
| Outpatient clinic                          | 293        | 11.44 (143.49) | 295          | 4.82 (30.34)   |
| Accident and emergency                     | 298        | 0.64 (7.83)    | 299          | 1.28 (13.53)   |
| Other hospital services                    | 297        | 1.12 (13.82)   | 299          | 1.31 (15.98)   |
| Ambulance use                              | 294        | 1.73 (21.00)   | 296          | 2.58 (25.58)   |
| Mean cost for available cases <sup>a</sup> | 283        | 38.61 (346.27) | 293          | 37.55 (352.79) |
| <b>Complete cases</b>                      |            |                |              |                |
| Overnight hospital stay                    | 266        | 7.03 (66.80)   | 262          | 28.03 (355.27) |
| Day care                                   | 266        | 17.56 (161.92) | 262          | 1.23 (14.37)   |
| Outpatient clinic                          | 266        | 12.60 (150.57) | 262          | 4.94 (31.27)   |
| Accident and emergency                     | 266        | 0.72 (8.29)    | 262          | 1.46 (14.45)   |
| Other hospital services                    | 266        | 1.25 (14.60)   | 262          | 0.75 (12.09)   |

|                              |     |                |     |                |
|------------------------------|-----|----------------|-----|----------------|
| Ambulance use                | 266 | 1.92 (22.07)   | 262 | 2.92 (27.18)   |
| Mean cost for complete cases | 266 | 41.08 (357.06) | 262 | 39.34 (366.13) |

a The mean cost for all available cases is summed over available cases across all categories of care reported, and hence is not equal to the sum of individual costs.

**Figure A1 Cost-effectiveness acceptability curve for complete case analysis**

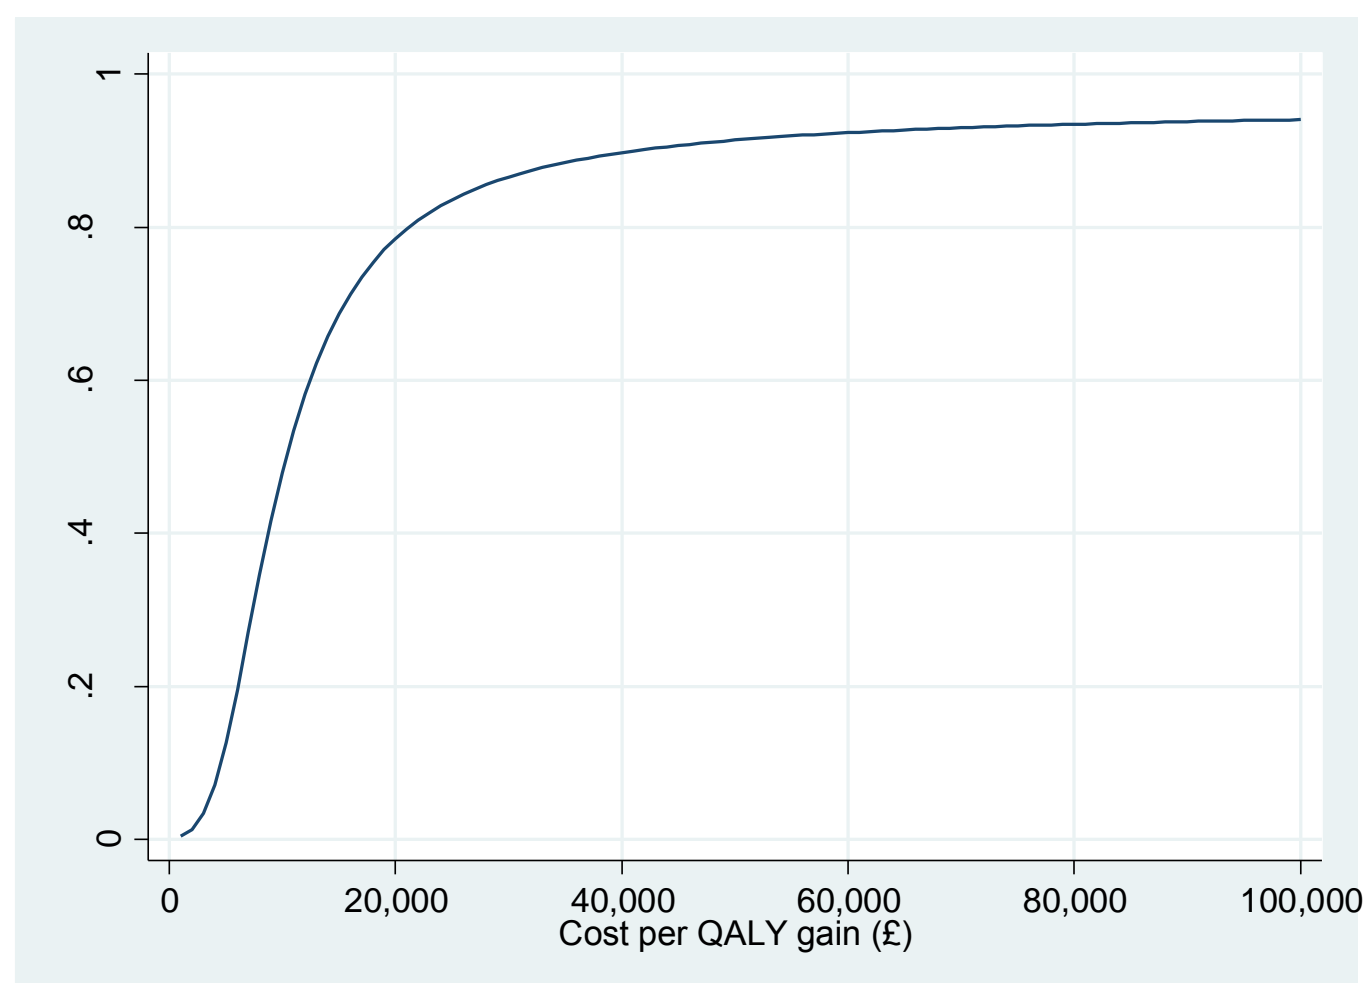

# References

1. Scott A, Simoens S, Heaney D, et al. What does GP out of hours care cost? An analysis of different models of out of hours care in Scotland. *ScottMed J* 2004;**49**(2):61-66.
2. O'Dowd A. Cost of out of hours care was 22% higher than predicted in England. *BMJ* 2006;**332**(7550):1113.
3. Munro J, Nicholl J, O'Cathain A, et al. Evaluation of NHS Direct first wave sites: Final report of the phase 1 research. Sheffield: MCRU University of Sheffield, 2001:1-84.
4. Curtis L. Unit Costs of Health and Social Care. Canterbury: Personal Social Services Research Unit, 2013.

5. Department of Health. Reference Costs 2012/13. London, 2013.
6. Curtis L. *Unit Costs of Health and Social Care 2013*. Canterbury: Personal Social Services Research Unit, 2013.
